# Supplementary material for: Can antimonide-based nanowires form wurtzite crystal structure?
Source: Royal Society of Chemistry journal article supplement (doi:10.1039/c5nr07362f), 2015-12-01
Supplement: c5nr07362f1.pdf [file c5nr07362f1.pdf]

# Can antimonide-based nanowires form wurtzite crystal structure?

Sepideh Gorji Ghalamestani<sup>1</sup>, Sebastian Lehmann<sup>1</sup>, Kimberly A. Dick<sup>1,2</sup>

<sup>1</sup> Solid State Physics, Lund University, Box 118 SE-22100 Lund, Sweden

<sup>2</sup> Polymer and Materials Chemistry, Lund University, Box 124, SE-22100 Lund, Sweden

## Supplementary information

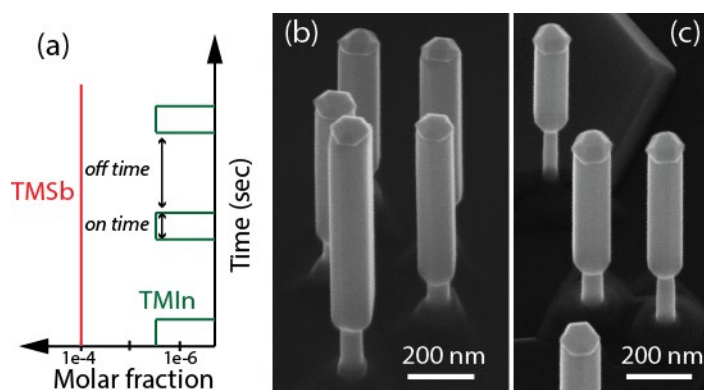

Figure S1 (a) Schematic illustration of TMSb and TMIn precursor molar fractions used to grow InSb nanowires where TMSb was kept constant ( $1.08 \times 10^{-4}$ ) and TMIn with molar fraction of  $4.88 \times 10^{-6}$  was pulsed. SEM images of a set of InAs-InSb nanowires where the InSb segment is grown with the conditions shown in (a). For (b) on time was set to 10 s and off time to 60 s with 30 cycles (c). For (c) on time was set to 5 and off time to 60 s with 30 cycles.
